# Supplementary material for: Alerts in Clinical Decision Support Systems (CDSS): A Bibliometric Review and Content Analysis
Source: MDPI journal article supplement (doi:10.3390/healthcare10040601), 2022-03-23
Supplement: s1 [file s1]

**Table S1. Ranking of top 20 articles (sorted by TLC)**

| #  | Article                         | Journal              | TLC | TGC | TLC/TGC Ratio (%) |
|----|---------------------------------|----------------------|-----|-----|-------------------|
| 1  | Nanji KC et al. (2014) [1]      | J AM MED INFORM ASSN | 51  | 116 | 44.0              |
| 2  | Phansalkar S et al. (2013) [2]  | J AM MED INFORM ASSN | 40  | 112 | 35.7              |
| 3  | Payne TH et al. (2015) [3]      | J AM MED INFORM ASSN | 38  | 85  | 44.7              |
| 4  | Seidling HM et al. (2011) [4]   | J AM MED INFORM ASSN | 34  | 77  | 44.2              |
| 5  | McCoy AB et al. (2012) [5]      | J AM MED INFORM ASSN | 31  | 70  | 44.3              |
| 6  | Bryant AD et al. (2014) [6]     | APPL CLIN INFORM     | 29  | 92  | 31.5              |
| 7  | Ancker JS et al. (2017) [7]     | BMC MED INFORM DECIS | 29  | 127 | 22.8              |
| 8  | Seidling HM et al. (2014) [8]   | INT J MED INFORM     | 25  | 50  | 50.0              |
| 9  | Coleman JJ et al. (2013) [9]    | BMC MED INFORM DECIS | 24  | 58  | 41.4              |
| 10 | Riedmann D et al. (2011) [10]   | BMC MED INFORM DECIS | 23  | 44  | 52.3              |
| 11 | Slight SP et al. (2013) [11]    | PLOS ONE             | 22  | 51  | 43.1              |
| 12 | Nanji KC et al. (2018) [12]     | J AM MED INFORM ASSN | 20  | 48  | 41.7              |
| 13 | Saverno KR et al. (2011) [13]   | J AM MED INFORM ASSN | 18  | 79  | 22.8              |
| 14 | Carspecken W et al. (2013) [14] | PEDIATRICS           | 18  | 59  | 30.5              |
| 15 | Bell GC et al. (2014) [15]      | J AM MED INFORM ASSN | 17  | 122 | 13.9              |
| 16 | Wright A et al. (2016) [16]     | J AM MED INFORM ASSN | 17  | 56  | 30.4              |
| 17 | Russ AL et al. (2012) [17]      | INT J MED INFORM     | 16  | 55  | 29.1              |
| 18 | Eppenga WL et al. (2012) [18]   | J AM MED INFORM ASSN | 16  | 31  | 51.6              |
| 19 | Scott GPT et al. (2011) [19]    | J AM MED INFORM ASSN | 15  | 36  | 41.7              |
| 20 | Duke JD et al. (2013) [2]       | J AM MED INFORM ASSN | 15  | 33  | 45.6              |

Abbreviations: TLC = Total local citations received, TGC = Total global citations received, J AM MED INFORM ASSN = Journal of the American Medical Informatics Association, BMC MED INFORM DECIS = BMC Medical Informatics and Decision Making, INT J MED INFORM = International Journal of Medical Informatics.

**Table S2. The content analysis for 24 most impactful articles (TGC  $\geq$  40 & TLC  $\geq$  10)**

| Articles                        | TLC | TGC | TLC/TGC Ratio | Study type                | Study location       | Study population                                  | Alerts Type   | Alert Topic                         | Analysis method    |
|---------------------------------|-----|-----|---------------|---------------------------|----------------------|---------------------------------------------------|---------------|-------------------------------------|--------------------|
| (Nanji KC et al., 2014) [7]     | 51  | 116 | 0.44          | Observational             | Outpatient           | Physician/Nurse/Other clinician                   | Not specified | ADE/Other recommendation            | Quali-Quantitative |
| (Phansalkar S et al., 2013) [2] | 40  | 112 | 0.36          | Observational             | Not specified        | NA                                                | Soft-stop     | DDI                                 | Quali-Quantitative |
| (Payne TH et al., 2015) [3]     | 38  | 85  | 0.45          | Observational             | N/A                  | Physician/IT/Academia /Diverse backgrounds expert | Not specified | DDI                                 | Qualitative        |
| (Seidling HM et al., 2011) [4]  | 34  | 77  | 0.44          | Observational             | Outpatient/Inpatient | Not specified                                     | Not specified | DDI                                 | Quantitative       |
| (McCoy AB et al., 2012) [5]     | 31  | 70  | 0.44          | Focus group/Observational | Inpatient            | Clinician                                         | Not specified | ADE/Laboratory/Other recommendation | Quali-Quantitative |
| (Ancker JS et al., 2017) [7]    | 29  | 127 | 0.23          | Observational             | Outpatient           | Physician/Nurse                                   | Interruptive  | Drug/Clinical practice              | Quantitative       |
| (Bryant AD et al., 2014) [6]    | 29  | 92  | 0.32          | Observational             | Inpatient            | Physicians                                        | Interruptive  | ADE                                 | Quantitative       |
| (Seidling HM et al., 2014) [8]  | 25  | 50  | 0.50          | Observational             | Outpatient/Inpatient | N/A                                               | Not specified | DDI                                 | Quali-Quantitative |
| (Coleman JJ et al., 2013) [9]   | 24  | 58  | 0.41          | Focus group               | Not specified        | Pharmacist                                        | N/A           | Allergy/DDI                         | Qualitative        |

|                                   |    |     |      |                                |                               |                                    |               |                                       |                    |
|-----------------------------------|----|-----|------|--------------------------------|-------------------------------|------------------------------------|---------------|---------------------------------------|--------------------|
| (Riedmann D et al., 2011) [10]    | 23 | 44  | 0.52 | Focus group                    | Not specified                 | CPOE expert                        | N/A           | ADE                                   | Qualitative        |
| (Slight SP et al., 2013) [11]     | 22 | 51  | 0.43 | Observational                  | Outpatient                    | Physician                          | Hard-stop     | DDI                                   | Quali-Quantitative |
| (Nanji KC et al., 2018) [12]      | 20 | 48  | 0.42 | Observational                  | Inpatient                     | Physician/Nurse/Other clinician    | Hard-stop     | ADE/Substitution/Other recommendation | Quali-Quantitative |
| (Saverno KR et al., 2011) [13]    | 18 | 79  | 0.23 | Interventional / On-site visit | Community/Inpatient/Other     | Pharmacist                         | Hard-stop     | DDI                                   | Quali-Quantitative |
| (Carspecken CW et al., 2013) [14] | 18 | 59  | 0.31 | Observational                  | PICU                          | One specific patient               | Pop-up        | Allergy                               | Qualitative        |
| (Bell GC et al., 2014) [15]       | 17 | 122 | 0.14 | Interventional                 | Inpatient s/ Outpatient/ Home | Physician/ Pharmacist              | Pop-up/Email  | Allergy                               | Quali-Quantitative |
| (Wright A et al., 2016) [16]      | 17 | 56  | 0.30 | Observational                  | Entire hospital               | Chief Medical Information Officers | Not mentioned | All types of EHR alert                | Quali-Quantitative |
| (Russ AL et al., 2012) [17]       | 16 | 55  | 0.29 | Observations/ Interview        | Outpatient                    | Physician/ Nurse/ Pharmacist       | Pop-up        | ADE                                   | Qualitative        |
| (Scheife RT et al., 2015) [20]    | 12 | 66  | 0.18 | Focus group                    | N/A                           | Diverse backgrounds expert         | N/A           | DDI                                   | Qualitative        |
| (Russ AL et al., 2014) [21]       | 12 | 50  | 0.24 | Interventional                 | N/A                           | Prescriber                         | Not mentioned | ADE                                   | Qualitative        |
| (Topaz M et al., 2016) [22]       | 12 | 45  | 0.27 | Observational                  | Inpatient                     | Provider                           | Hard-stop     | Allergy                               | Quali-Quantitative |

|                                   |    |     |      |                |                                                                |           |                  |                              |                  |
|-----------------------------------|----|-----|------|----------------|----------------------------------------------------------------|-----------|------------------|------------------------------|------------------|
| (Romano M] et al.,<br>2011) [23]  | 11 | 192 | 0.06 | Observational  | Outpatient/<br>Emergency<br>All<br>wards(Except ED<br>and ICU) | Physician | N/A              | N/A                          | Qualitative      |
| (Baysari MT et al.,<br>2011) [24] | 11 | 46  | 0.24 | Observational  |                                                                | Physician | Hard-<br>stop    | All types<br>of EHR<br>alert | Quali-<br>Quanti |
| (Wright A et al., 2011)<br>[25]   | 11 | 45  | 0.24 | Observational  | N/A                                                            | N/A       | N/A              | N/A                          | Qualitative      |
| (Hoffman JM et al.,<br>2014) [26] | 10 | 143 | 0.07 | Interventional | All<br>primary<br>clinical<br>services                         | Physician | Interrupti<br>ve | Allergy                      | Qualitative      |

---

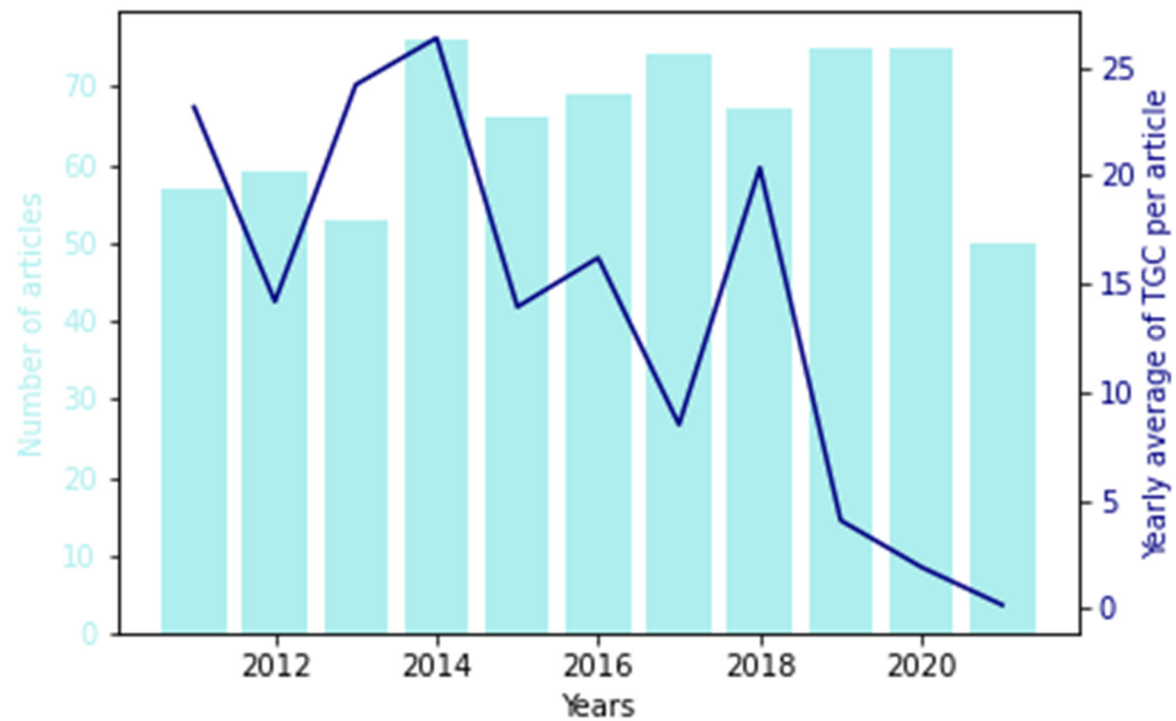

**Figure S1. Distribution of yearly publications and the yearly averages of TGC per article**

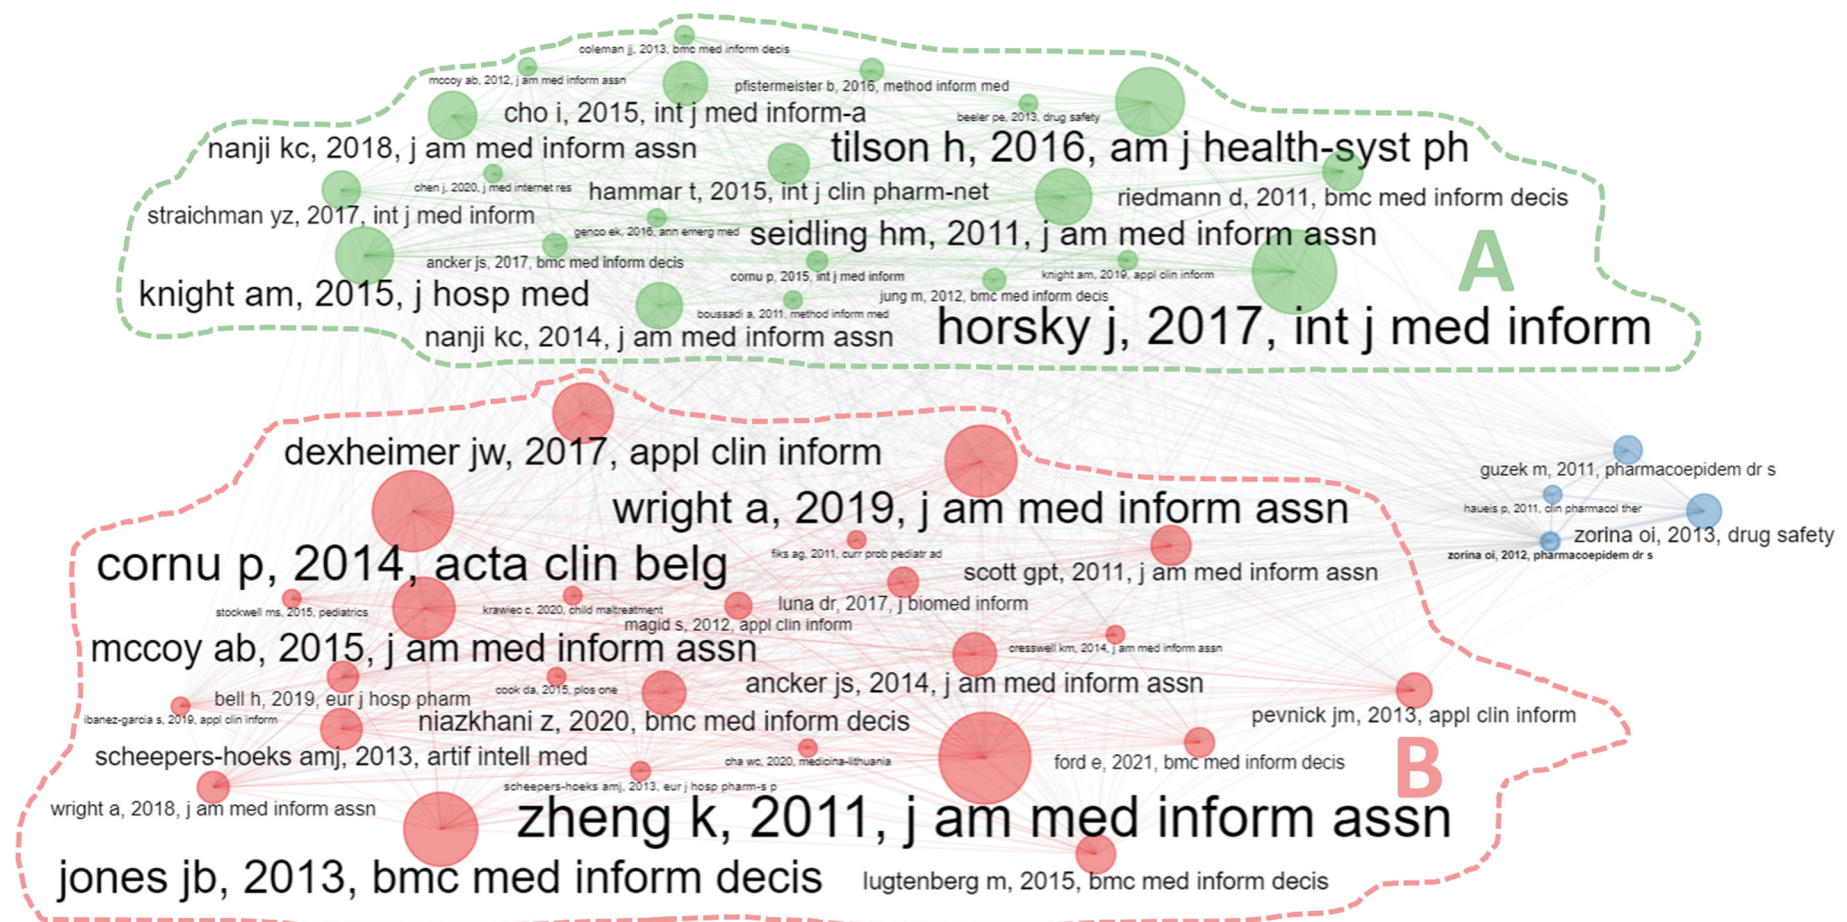

**Figure S2. Bibliographic coupling (A = Medication-related cluster, B = Best practice cluster)**

1. Nanji, K.C., et al., *Overrides of medication-related clinical decision support alerts in outpatients*. 2014. **21**(3): p. 487-491.
2. Phansalkar, S., et al., *Drug—drug interactions that should be non-interruptive in order to reduce alert fatigue in electronic health records*. 2013. **20**(3): p. 489-493.
3. Payne, T.H., et al., *Recommendations to improve the usability of drug-drug interaction clinical decision support alerts*. 2015. **22**(6): p. 1243-1250.
4. Seidling, H.M., et al., *Factors influencing alert acceptance: a novel approach for predicting the success of clinical decision support*. 2011. **18**(4): p. 479-484.
5. McCoy, A.B., et al., *A framework for evaluating the appropriateness of clinical decision support alerts and responses*. 2012. **19**(3): p. 346-352.
6. Bryant, A., G. Fletcher, and T.J.A.c.i. Payne, *Drug interaction alert override rates in the Meaningful Use era*. 2014. **5**(03): p. 802-813.
7. Ancker, J.S., et al., *Effects of workload, work complexity, and repeated alerts on alert fatigue in a clinical decision support system*. 2017. **17**(1): p. 1-9.
8. Seidling, H.M., et al., *What, if all alerts were specific—estimating the potential impact on drug interaction alert burden*. 2014. **83**(4): p. 285-291.
9. Coleman, J.J., et al., *On the alert: future priorities for alerts in clinical decision support for computerized physician order entry identified from a European workshop*. 2013. **13**(1): p. 1-8.
10. Riedmann, D., et al., *Development of a context model to prioritize drug safety alerts in CPOE systems*. 2011. **11**(1): p. 1-11.
11. Slight, S.P., et al., *Are we heeding the warning signs? Examining providers' overrides of computerized drug-drug interaction alerts in primary care*. 2013. **8**(12): p. e85071.
12. Nanji, K.C., et al., *Medication-related clinical decision support alert overrides in inpatients*. 2018. **25**(5): p. 476-481.
13. Saverno, K.R., et al., *Ability of pharmacy clinical decision-support software to alert users about clinically important drug—drug interactions*. 2011. **18**(1): p. 32-37.
14. Carspecken, C.W., et al., *A clinical case of electronic health record drug alert fatigue: consequences for patient outcome*. 2013. **131**(6): p. e1970-e1973.
15. Bell, G.C., et al., *Development and use of active clinical decision support for preemptive pharmacogenomics*. 2014. **21**(e1): p. e93-e99.
16. Wright, A., et al., *Analysis of clinical decision support system malfunctions: a case series and survey*. 2016. **23**(6): p. 1068-1076.
17. Russ, A.L., et al., *Prescribers' interactions with medication alerts at the point of prescribing: a multi-method, in situ investigation of the human—computer interaction*. 2012. **81**(4): p. 232-243.

18. Eppenga, W.L., et al., *Comparison of a basic and an advanced pharmacotherapy-related clinical decision support system in a hospital care setting in the Netherlands*. 2012. **19**(1): p. 66-71.
19. Scott, G.P., et al., *Making electronic prescribing alerts more effective: scenario-based experimental study in junior doctors*. 2011. **18**(6): p. 789-798.
20. Scheife, R.T., et al., *Consensus recommendations for systematic evaluation of drug-drug interaction evidence for clinical decision support*. *Drug Saf*, 2015. **38**(2): p. 197-206.
21. Russ, A.L., et al., *Applying human factors principles to alert design increases efficiency and reduces prescribing errors in a scenario-based simulation*. *J Am Med Inform Assoc*, 2014. **21**(e2): p. e287-96.
22. Topaz, M., et al., *Rising drug allergy alert overrides in electronic health records: an observational retrospective study of a decade of experience*. *J Am Med Inform Assoc*, 2016. **23**(3): p. 601-8.
23. Romano, M.J. and R.S. Stafford, *Electronic health records and clinical decision support systems: impact on national ambulatory care quality*. *Arch Intern Med*, 2011. **171**(10): p. 897-903.
24. Baysari, M.T., et al., *The influence of computerized decision support on prescribing during ward-rounds: are the decision-makers targeted?* *J Am Med Inform Assoc*, 2011. **18**(6): p. 754-9.
25. Wright, A., et al., *Governance for clinical decision support: case studies and recommended practices from leading institutions*. *J Am Med Inform Assoc*, 2011. **18**(2): p. 187-94.
26. Hoffman, J.M., et al., *PG4KDS: a model for the clinical implementation of pre-emptive pharmacogenetics*. *Am J Med Genet C Semin Med Genet*, 2014. **166c**(1): p. 45-55.
